# Supplementary material for: Interplay between cell cycle and autophagy induced by boswellic acid analog
Source: PubMed Central journal article supplement (PMC5041107; doi:10.1038/srep33146), 2016-09-29
Supplement: srep33146-s1.pdf [file srep33146-s1.pdf]

## **Supplementary Information**

### **Interplay between cell cycle and autophagy induced by boswellic acid analog**

Anup S Pathania ,Santosh K Guru, Suresh Kumar, Ashok Kumar, Masroor Ahmad, Shashi Bhushan, Parduman R Sharma, Priya Mahajan, Bhahwal A Shah, Simmi Sharma, Amit Nargotra, Ram Vishwakarma, Hasan Korkaya and Fayaz Malik

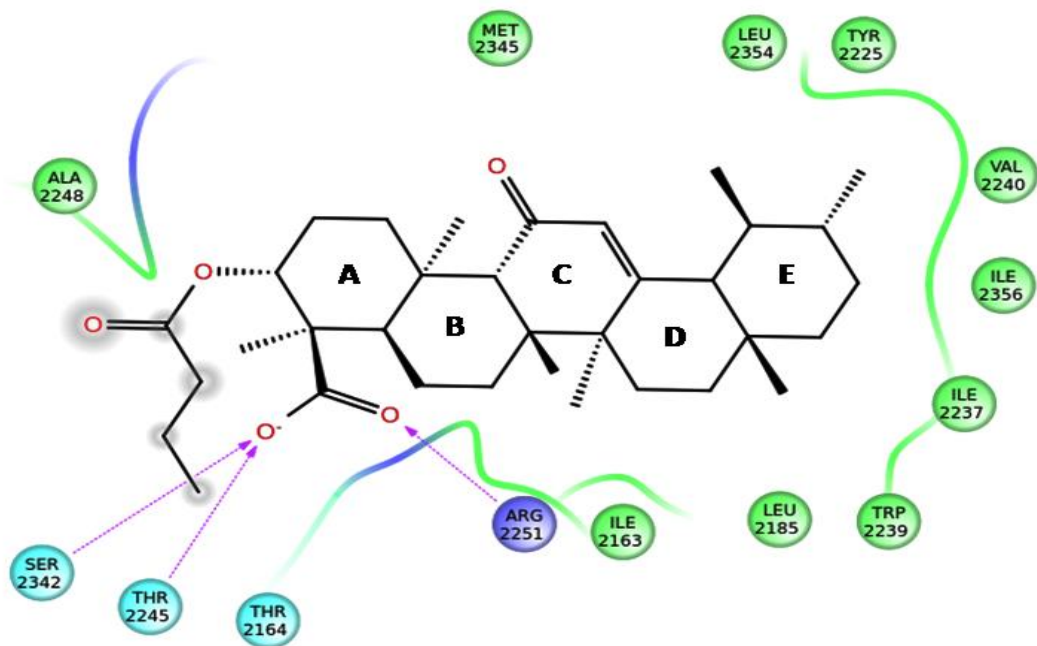

**Figure. S1** 2D Interaction diagram of BA145 with Mtor: here green, cyan and blue sphere indicates hydrophobic, polar and basic amino acids residues respectively of the protein within  $3\text{\AA}$  distance from the centroid of the ligand.
